# Supplementary material for: Plasmacytoid Dendritic Cells Promote Immunosuppression in Ovarian Cancer via ICOS Costimulation of Foxp3+ T-Regulatory Cells
Source: Oxford University Press journal article supplement (doi:10.1158/0008-5472.can-12-2271), 2012-08-01
Supplement: 00085472can122271-sup-f1_54k.pdf [file 00085472can122271-sup-f1_54k.pdf]

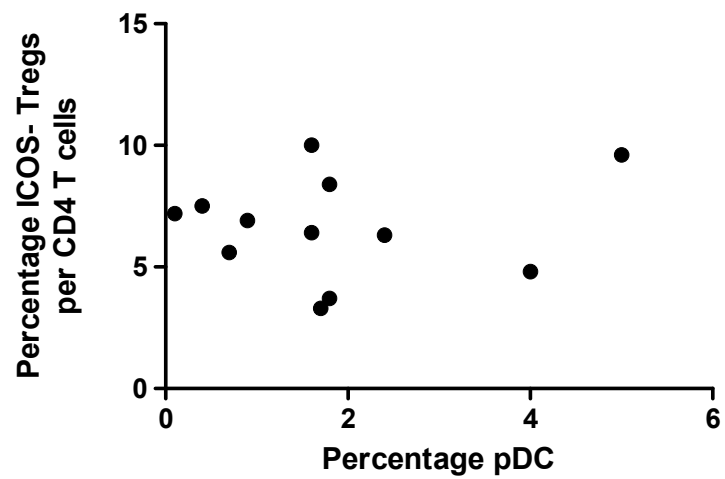

**Supplemental Figure 1: Plasmacytoid dendritic cells do not correlate with ICOS<sup>-</sup> Foxp3<sup>+</sup> T regulatory cells in the tumor microenvironment.** Percentages of plasmacytoid dendritic cells (pDC) and percentages of ICOS<sup>-</sup> Foxp3<sup>+</sup> T regulatory cells as analyzed by FACS show no correlation within the tumor microenvironment of ovarian cancer.
