# Supplementary material for: Plasmacytoid Dendritic Cells Promote Immunosuppression in Ovarian Cancer via ICOS Costimulation of Foxp3+ T-Regulatory Cells
Source: Oxford University Press journal article supplement (doi:10.1158/0008-5472.can-12-2271), 2012-08-01
Supplement: 00085472can122271-sup-fl3_tl1_52k.pdf [file 00085472can122271-sup-fl3_tl1_52k.pdf]

## SUPPLEMENTAL FIGURE LEGENDS

**Supplemental Table 1: Clinical characteristics of EOC patients.** *HG = high grade*

**Supplemental Figure 1: Plasmacytoid dendritic cells do not correlate with ICOS<sup>-</sup> Foxp3<sup>+</sup> T regulatory cells in the tumor microenvironment.** Percentages of plasmacytoid dendritic cells (pDC) and percentages of ICOS<sup>-</sup> Foxp3<sup>+</sup> T regulatory cells as analyzed by FACS show no correlation within the tumor microenvironment of ovarian cancer.

**Supplemental Figure 2: Survival of ICOS<sup>+</sup> but not ICOS<sup>-</sup> T regulatory cells are dependent on ICOS-L provided by plasmacytoid dendritic cells.** ICOS<sup>+</sup> and ICOS<sup>-</sup> T regulatory cells isolated from peripheral blood of healthy volunteers were co-cultured with or without autologous plasmacytoid dendritic cells in the presence or absence of neutralizing anti-ICOS-L antibodies as described. *Data depicted represent numbers of viable cells after four days of culture. Representative experiment of at least three independent experiments is shown. pDC = plasmacytoid dendritic cells, Treg = T regulatory cells*
